# Supplementary material for: Intratumoral expression analysis reveals that OX40 and TIM-3 are prominently expressed and have variable associations with clinical outcomes in high grade serous ovarian cancer
Source: PubMed Central journal article supplement — Oncol Lett. 2022 Apr 26;23(6):188. doi: 10.3892/ol.2022.13308 (PMC9073576; doi:10.3892/ol.2022.13308), 2022-04-26

Figure S1. Representative immunofluorescence staining with DAPI. Representative confocal image of immunofluorescence double staining of TIM-3 with CD8 (magnification, x40) merged with DAPI.

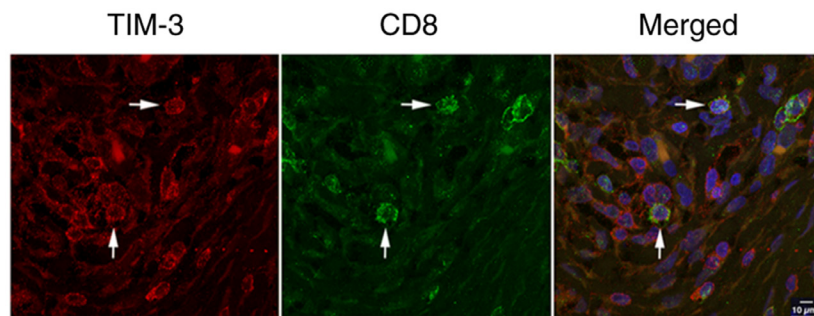

Figure S2. OX40 and TIM-3 expression stratified by median progression-free and overall survival. (A) OX40 and (B) TIM-3 expression (number of positive cells per field) stratified according to median progression-free survival from immunohistochemical analysis of 29 patients with HGSOC. (C) OX40 and (D) TIM-3 expression (number of positive cells per field) stratified according to median overall survival from immunohistochemical analysis of 29 HGSOC patients. (E) OX40 and (F) TIM-3 transcript expression ( $-\log_{10}$ ) stratified according to median progression-free survival from the ovarian cancer TCGA cohort. (G) OX40 and (H) TIM-3 mRNA expression ( $-\log_{10}$ ) stratified according to median overall survival from TCGA ovarian cancer cohort. NS, not significant; TCGA, The Cancer Genome Atlas.

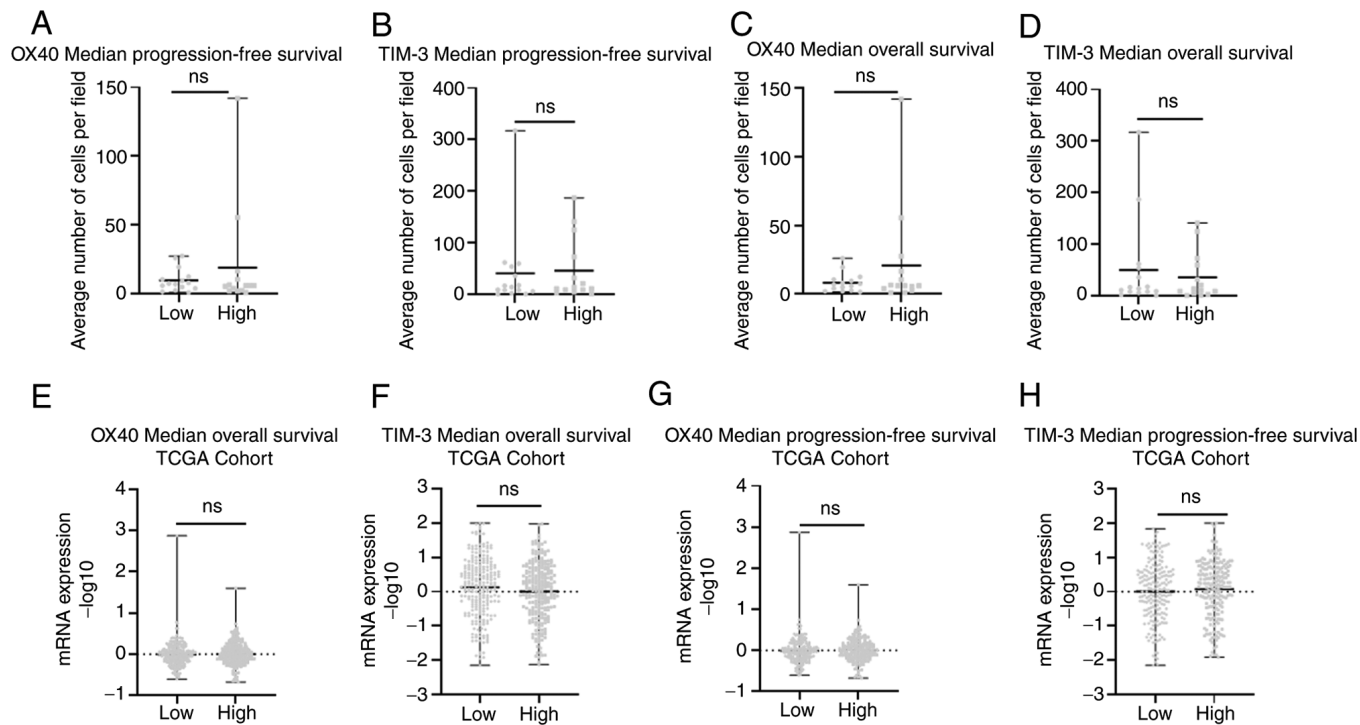

Supplement: Supplementary_Data2.pdf [file Supplementary_Data2.pdf]
